# Supplementary material for: A eukaryotic-like 3′ untranslated region in Salmonella enterica hilD mRNA
Source: PubMed Central journal article supplement (PMC4027200; doi:10.1093/nar/gku222), 2014-03-20
Supplement: supp_gku222_nar-01629-a-2013-File009.pdf [file supp_gku222_nar-01629-a-2013-File009.pdf]

A eukaryotic-like 3' untranslated region in *Salmonella enterica*  
*hilD* mRNA

Javier López-Garrido, Elena Puerta-Fernández, Josep Casadesús

## SUPPLEMENTARY DATA

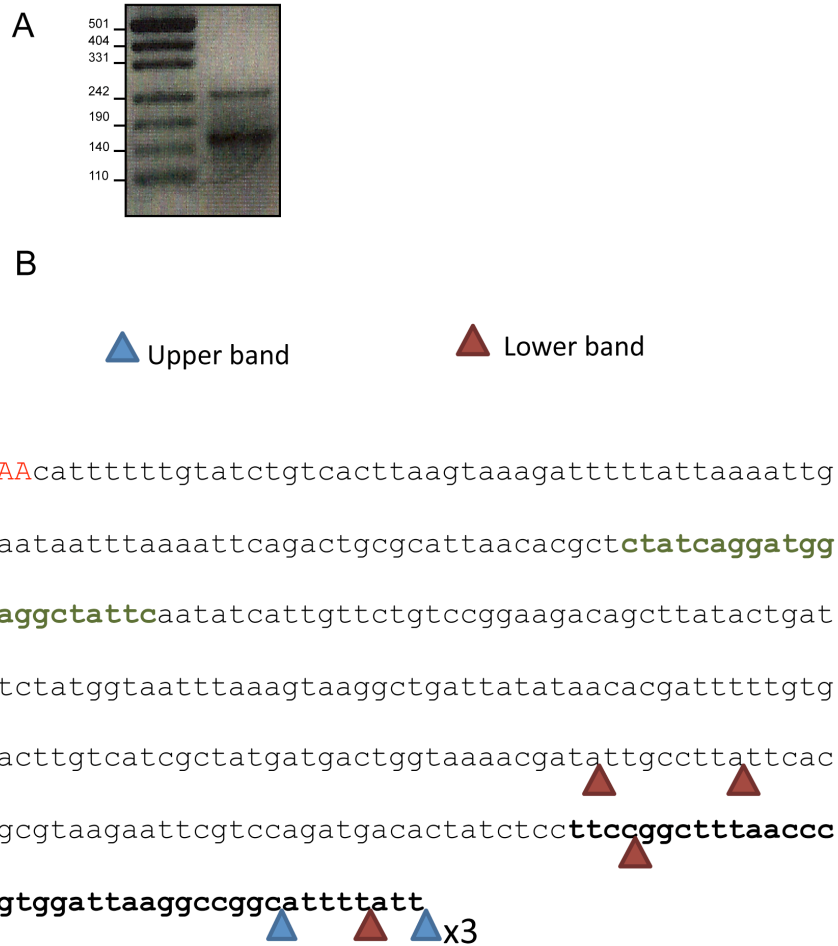

**Figure S1. A.** 3'RACE of *hilD* mRNA. Two different fragments appear after PCR amplification, identified by a sharp band slightly over 242 nt and a fainter band between 140 and 190 nt. Both fragments were purified and cloned on the pTOPO vector, and four independent clones were sequenced for each fragment. Their specific 3'ends of are shown in panel B. **B.** Blue arrowheads mark the 3' end of the four different clones of the higher band. Three such clones map at the same point, right after the U-rich region of the Rho-independent transcriptional terminator (sequence in bold), and one maps 8 nt upstream. Red arrowheads indicate the 3' end of the clones of the lower band. They all map in different positions along the 3'UTR, suggesting that they may be degradation intermediates. The *hilD* stop codon is shown in red capital letters, and the oligonucleotide used for 3'RACE is outlined in green.

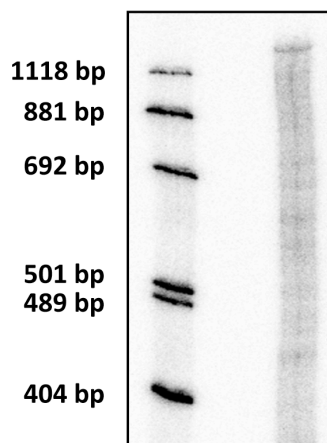

**Figure S2.** Northern blot of *hiiD* mRNA in a 4.5% acrylamide gel. 10  $\mu\text{g}$  of total RNA from *S. enterica* 14028 was loaded in a 4.5% polyacrylamide gel (right lane), transferred onto a Hybond-XL nitrocellulose membrane (GE Healthcare) and hybridized with a  $\text{P}^{32}$ -labelled riboprobe specific for the upstream (5') 300 nucleotides of the *hiiD* coding sequence. A sharp band of a size higher than 1118 nucleotides is observed, together with a smear probably due to RNA degradation. 5'-end labelled DNA fragments obtained from pUC57 digestion with HindIII and pUC19 digestion with MspI and DraI were used as molecular weight size marker.

```

sv. Typhimurium      TAAcattttttgtatctgtcacttaagtaagatttttattaaaa-ttgtaataattttaaattcagactgcg
sv. Enteritidis     TAAcattttttgtatctgtcacttaagtaagatttttattaaaa-ttgtaataattttaaattcagactgcg
sv. Typhi           TAAca-tttttgtatcagtcactcaagtaagatttttattaaaa-ttttaataattttaaattcagaccgtgc
subsp. salamae     TAAcattttg-atacctattgctcaagaaaacttttattaaaa-----atttaaaattctgaccattt
subsp. arizonae   TAAcattttt-gggtttatcactcaagaaaagatttttcattaaaa-ttttagcaattttaaattctgaacactt
subsp. houtenae   TAAcattttt-ggttgatcactcaagaaaatatttttattaaaa-tcttaataattttaaattctgaacactt
Salmonella bongori TAAcatttttcgtatttattactcaagaaaatatttttattaaaaacttttttcatttaacattataaacgctt
*****          *  ** ** * ** * ** * *****          ***** ** *

```

```

sv. Typhimurium      attaacacgctctatcaggatgggaggctattcaatatcattgttctgtccggaagacagcttatactgatc
sv. Enteritidis     attaacacgctctatcaggatgggaggctattcaatatcattgttctgtccggaagacagcttatactgatc
sv. Typhi           attaacacgctatatacaggatgggaggctattcaacatcattgttctgtccggaagacagcttatactgatc
subsp. salamae     attaacgctgttatagcaggacaggaggctattcaacatcattgttctgtcccagaagataggctgactgatc
subsp. arizonae   tataaacacaccataataggattggagggtattcaacatcattgttctgtccagaagacagctccgactgatc
subsp. houtenae   cataaacgccataataggactggagggtattcaacatcattgttctgtccggaagacagcctgactgttatc
Salmonella bongori attaatacgcctatagtaggatgggaggctatttaacattgttctgtccaaaagacagcctgactgatc
***          **  ****  *****  *****  ** *  *****  **  ****  **  *  ** *

```

```

sv. Typhimurium      tatggtaatttaaagtaaggctgattatataaacacgatttttgtgaacttgtcatcgctatgatgactggtaaa
sv. Enteritidis     tctggtaatttaaagtaaggctgattatataaacacgatttttgtgaacttgtcatcgctatgatgactggtaaa
sv. Typhi           tctggtaatttaaagtaaggctgattatataaacacgatttttgtgaacttgtcatcgctatgatgactggtaaa
subsp. salamae     tcttgcaatttaaagtaaggctgattatataaacacgatttttgtgaacttgtcatcgctatgatgactggtaaa
subsp. arizonae   tctgacaatttaaagcaaggctgttcttacaacgcgacttttgtgaactgtcatcgctatgatgactggtaaa
subsp. houtenae   tctggaaatttaaagcaaggctgattatataaacgcaatttttgtgaactgtcatcgctatgatgactggtaaa
Salmonella bongori tctggcaatttactgtaaggctgattatgcaacgcgatttttgtgaacttgtcatcgctatgatgactggtaaa
* *  *****  *  *****  *  *  *  *  *  *****  *****  *****  *****

```

```

sv. Typhimurium      acgatattgccttattcacatcgtaagaattcgtccagatgacactatctccttccggctttaaccctgtggat
sv. Enteritidis     acgatattgccttattcacagcgtgaagaattcgtccagatgacactatctccttccggctttaaccctgtggat
sv. Typhi           ccgatattgccttattcacagcgtgaagaattcgtccagatgacactatctccttccggctttaaccctatggat
subsp. salamae     ctgatattacctcattcacagcgtgaagaattcgtccggatgaaactatctccttccggctttagccctatggac
subsp. arizonae   cctatattaccttattcacagcgtgaaaattcgtccagatgaaagtatctccttccggctttaaccctgtggac
subsp. houtenae   ccaatattaccttattcacagcgtgagaattcgtccagatgaaactatctccttccggctttaaccctgtggtc
Salmonella bongori ccaatattaccttattcacagcgtgagaattcgtccagatgaaactatctccttccggctttagccctgtggac
***** **  *****  *** *  ***  ***  *****  *  *****  *****  *****

```

```

sv. Typhimurium      taaggccggcattttatt
sv. Enteritidis     taaggccggcattttatt
sv. Typhi           taaggccggcattttatt
subsp. salamae     taaagccggcattttatt
subsp. arizonae   taaagccggcattttatt
subsp. houtenae   taaagccggcattttatt
Salmonella bongori taa-gccggcattttatt
***  *****

```

**Figure S3.** Alignment of the 3'UTR region of *Salmonella enterica* and *Salmonella bongori* serovars. An asterisk indicates nucleotides that are conserved in all sequences. Bold letters indicate the sequence of the Rho-independent transcriptional terminator.

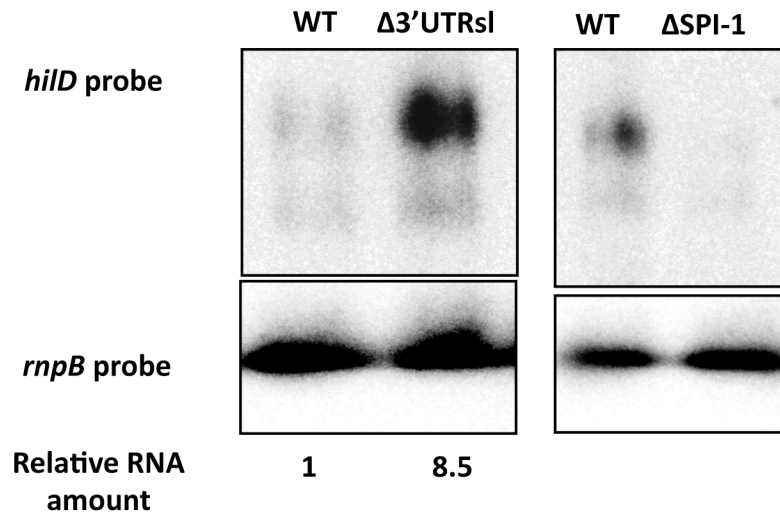

**Figure S4.** Northern blots of *S. enterica* ATCC 14028, *hilD*  $\Delta 3'UTRsl$  (SV8082) and  $\Delta SPI-1$  (SV6019) strains. A *hilD* riboprobe was used to detect *hilD* mRNA. *rnpB* mRNA was used as loading control. For quantification, the ratio *hilD/rnpB* was normalized to 1 in *hilD* mRNA carrying a native 3'UTR.

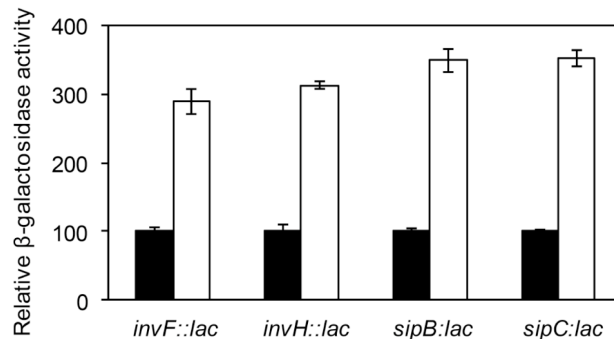

**Figure S5.**  $\beta$ -galactosidase activities of *invF::lac*, *invH::lac*, *sipB::lac*, and *sipC::lac* fusions in strains with a native *hilD* 3'UTR (black histograms) or carrying the *hilD*  $\Delta 3'UTR$  allele (white histograms). Due to the disparate activities of the fusions,  $\beta$ -galactosidase activities have been normalized to 100 in the 3'UTR<sup>+</sup> background.

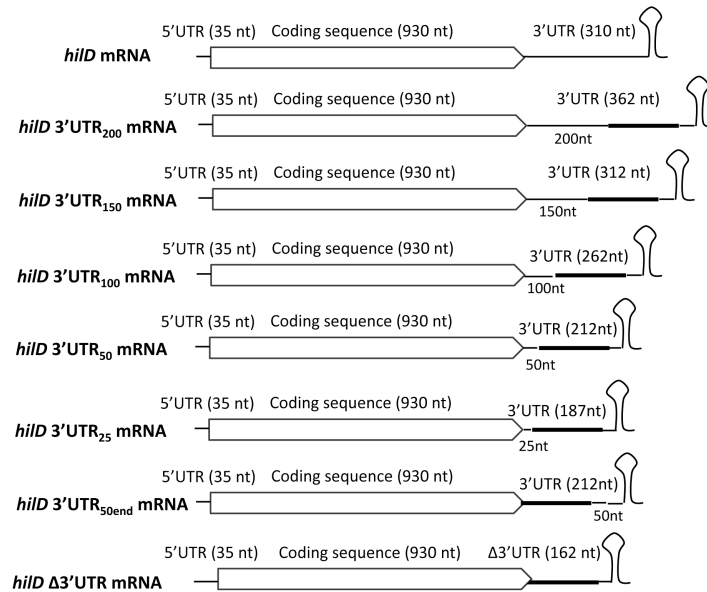

**Figure S6.** Diagrams of the primary structure of *hilD* mRNA in the 3'UTR deletion mutants constructed for this study. The thick line in the 3' region of *hilD* mRNA represents the 82-nt pKD13 scar. The Rho-independent transcriptional terminator, which is left intact in all constructs, is also shown.

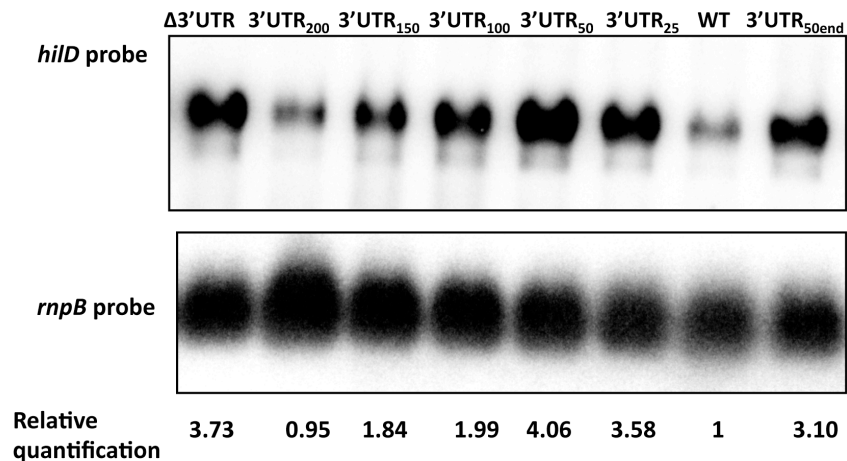

**Figure S7.** Northern blots of *hilD* mRNA in isogenic strains carrying mutations in the *hilD* 3'UTR region. For quantification, the ratio *hilD/rnpB* was normalized to 1 in *hilD* mRNA carrying a native 3'UTR (WT).

**UAA**cauuuuuu**g**aucugucacuua**g**uaaagauuuuuau  
ua**aa**auuguaauaauuua**aa**auucagacug**cg**cauuaaca  
cgcucuaca**gg**augggaggcuauucaauaucauguucu  
guccggaagacagcuuauacugauaucuaugguaauuuuaa  
aguaaggcugauuauuaaacacgauuuuugugaacuuguc  
aucgcuaugaugacugguaaaacgauauugccuuauucac  
agcguaagaauucguccagaugacacuaucuccuu**ccggc**  
**uuuaacc**cuguggauuaagg**ccggc**auuuuuuu

**Figure S8.** Nucleotide sequence of the *hilD* 3'UTR indicating putative RNase E cleavage sites (A/GN↓AU, shown in red) for the first 100 nucleotides of the 3'UTR (underlined). Bold, uppercase UAA represents the *hilD* stop codon, and the sequence in bold at the end indicates the transcriptional terminator shown in Fig. 1. The second putative RNase E cleavage site depicted (GUA) can be expected to yield a putative cleavage site (GUAU) in the mutant containing 25 nucleotides of 3'UTR, after the pKD13 scar has been generated.

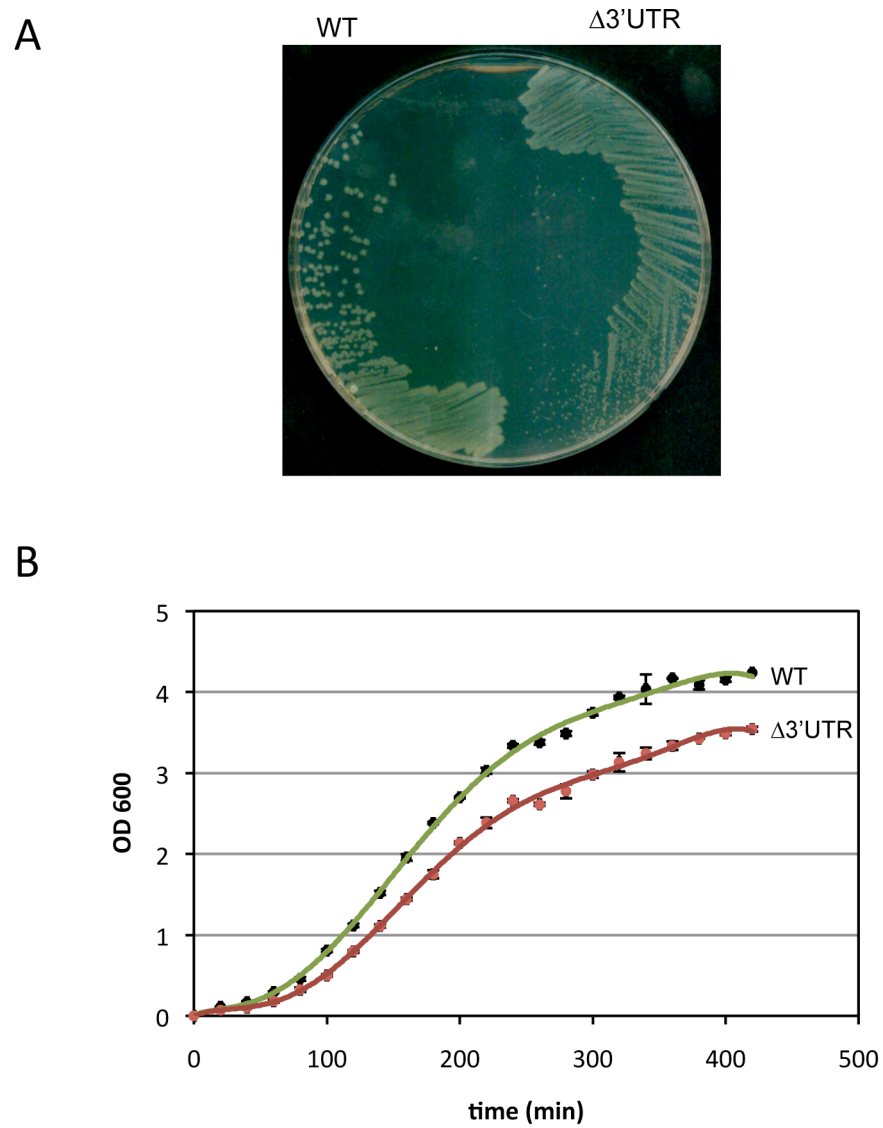

**Figure S9. A.** Colonies of ATCC 14028 (left) and the *hilD* $\Delta 3'UTR$  strain SV6190 (right) on an LB agar plate. **B.** Growth curves of ATCC 14028 and SV6190 (*hilD* $\Delta 3'UTR$ ) in LB broth at 37 °C with shaking at 200 rpm (averages and standard deviations from three independent experiments).



**Table S1.** Strain list

| Strain designation | Genotype or description                                               | Reference or source                             |
|--------------------|-----------------------------------------------------------------------|-------------------------------------------------|
| ATCC 14028         | Wild type                                                             | American Type Culture Collection                |
| SV5293             | $\Phi$ ( <i>sipC</i> '-lacZ <sup>+</sup> )                            | (Lopez-Garrido and Casadesus 2010) <sup>a</sup> |
| SV5297             | $\Phi$ ( <i>invF</i> '-lacZ <sup>+</sup> )                            | (Lopez-Garrido and Casadesus 2010) <sup>a</sup> |
| SV5301             | $\Phi$ ( <i>invH</i> '-lacZ <sup>+</sup> )                            | (Lopez-Garrido and Casadesus 2010) <sup>a</sup> |
| SV5382             | $\Phi$ ( <i>sipB</i> '-lacZ <sup>+</sup> )                            | (Lopez-Garrido and Casadesus 2010) <sup>a</sup> |
| SV5457             | <i>invF</i> ::3xFLAG                                                  | (Lopez-Garrido and Casadesus 2010) <sup>a</sup> |
| SV5458             | <i>invH</i> ::3xFLAG                                                  | This study                                      |
| SV5459             | <i>sipB</i> ::3xFLAG                                                  | This study                                      |
| SV5460             | <i>sipC</i> ::3xFLAG                                                  | This study                                      |
| SV5646             | <i>hfq</i> ::Km <sup>r</sup>                                          | This study                                      |
| SV5961             | $\Delta$ <i>rne</i> :: <i>cat</i>                                     | (Lopez-Garrido and Casadesus 2010) <sup>a</sup> |
| SV5963             | $\Delta$ <i>pnp</i> :: <i>cat</i>                                     | (Lopez-Garrido and Casadesus 2010) <sup>a</sup> |
| SV6019             | $\Delta$ <i>SPI-1</i> (Km <sup>r</sup> )                              | F. Baisón-Olmo                                  |
| SV6189             | <i>hilD</i> $\Delta$ 3'UTR (Km <sup>r</sup> )                         | This study                                      |
| SV6190             | <i>hilD</i> $\Delta$ 3'UTR                                            | This study                                      |
| SV6192             | <i>hilD</i> $\Delta$ 3'UTR <i>hfq</i> ::Km <sup>r</sup>               | This study                                      |
| SV6227             | <i>hilD</i> $\Delta$ 3'UTR $\Phi$ ( <i>invF</i> '-lacZ <sup>+</sup> ) | This study                                      |
| SV6636             | P <sub>LtetO</sub> - <i>hilD</i>                                      | This study                                      |
| SV6637             | P <sub>LtetO</sub> - <i>hilD</i> $\Delta$ 3'UTR                       | This study                                      |
| SV6639             | <i>hilD</i> $\Delta$ 3'UTR $\Delta$ <i>pnp</i> :: <i>cat</i>          | This study                                      |
| SV6640             | <i>hilD</i> $\Delta$ 3'UTR $\Delta$ <i>rne</i> :: <i>cat</i>          | This study                                      |
| SV6642             | <i>hilD</i> $\Delta$ 3'UTR <i>invF</i> ::3xFLAG                       | This study                                      |

---

|        |                                                                 |            |
|--------|-----------------------------------------------------------------|------------|
| SV6643 | <i>hfq::Cm<sup>r</sup> invF::3xFLAG</i>                         | This study |
| SV6644 | <i>hilD</i> Δ3'UTR <i>hfq::Cm<sup>r</sup> invF::3xFLAG</i>      | This study |
| SV6645 | <i>hilD</i> Δ3'UTR <i>invH::3xFLAG</i>                          | This study |
| SV6646 | <i>hilD</i> Δ3'UTR Φ( <i>sipB'</i> - <i>lacZ</i> <sup>+</sup> ) | This study |
| SV6648 | <i>hilD</i> Δ3'UTR <i>sipB::3xFLAG</i>                          | This study |
| SV6649 | <i>hfq::Cm<sup>r</sup> sipB::3xFLAG</i>                         | This study |
| SV6650 | <i>hilD</i> Δ3'UTR <i>hfq::Cm<sup>r</sup> sipB::3xFLAG</i>      | This study |
| SV6651 | <i>hilD</i> Δ3'UTR Φ( <i>sipC'</i> - <i>lacZ</i> <sup>+</sup> ) | This study |
| SV6653 | <i>hilD</i> Δ3'UTR <i>sipC::3xFLAG</i>                          | This study |
| SV6654 | <i>hfq::Cm<sup>r</sup> sipC::3xFLAG</i>                         | This study |
| SV6655 | <i>hilD</i> Δ3'UTR <i>hfq::Cm<sup>r</sup> sipC::3xFLAG</i>      | This study |
| SV6656 | <i>hilD</i> Δ3'UTR Φ( <i>invH'</i> - <i>lacZ</i> <sup>+</sup> ) | This study |
| SV6789 | Δ <i>rng::cat</i>                                               | This study |
| SV6790 | <i>hilD</i> Δ3'UTR Δ <i>rng::cat</i>                            | This study |
| SV6791 | Δ <i>pcnB::cat</i>                                              | This study |
| SV6792 | <i>hilD</i> Δ3'UTR Δ <i>pcnB::cat</i>                           | This study |
| SV7440 | 14028/pIZ1988 (GFP-3'UTR)                                       | This study |
| SV7441 | 14028/pIZ1989 (GFPΔ3'UTR)                                       | This study |
| SV7600 | <i>hilD</i> 3'UTR <sub>200</sub>                                | This study |
| SV7601 | <i>hilD</i> 3'UTR <sub>150</sub>                                | This study |
| SV7602 | <i>hilD</i> 3'UTR <sub>100</sub>                                | This study |
| SV7603 | <i>hilD</i> 3'UTR <sub>50</sub>                                 | This study |
| SV7604 | <i>hilD</i> 3'UTR <sub>25</sub>                                 | This study |
| SV7896 | <i>hilD</i> 3'UTR <sub>50end</sub>                              | This study |
| SV8082 | <i>hilD</i> Δ3'UTRsl                                            | This study |

---

<sup>a</sup> J. López-Garrido & J. Casadesús, *Genetics* **184**: 637-649 (2010)

**Table S2.** Oligonucleotides used in this study (5'→3')

| Oligonucleotide | Sequence                                                      |
|-----------------|---------------------------------------------------------------|
| hilDriboprobeUP | atggaaaatgtaacctttgtaag                                       |
| hilDriboprobeDO | gtttttaatacgcactactatagggagggtatcgaaatccatgtggc               |
| rnpBriboprobeUP | gaagaagtgaactgaccgataagc                                      |
| rnpBriboprobeDO | taatacgcactactatagggccgaagctgaccagacagtcg                     |
| JVO5527         | ctatcaggatgggaggctattc                                        |
| hilD-E2'        | atcatcctcaggctggctcc                                          |
| RT-hilD3'-UP    | agcttacggatgttgccgatc                                         |
| JVO5462         | aactacgccatcgacattcataaaaatggcgaaccattaaattccggggatccgctcgacc |
| JVO5463         | ggagatagtgtcatctggacgaattcttacgctgtgaatagttaggctggagctgcttc   |
| rngUP           | accgaattcgcgtgcactcacgtctgacctatgagtcgctcatatgaatatcctccttag  |
| rngDO           | cggctgatggccactgtaatgctccagcttactggcattgtaggctggagctgcttcg    |
| rng-E1          | ggtgcatacggatttcaggg                                          |
| rng-E2          | tcgtcgagattacgggtgctc                                         |
| pcnBUP          | gcccgtcgcgtaatgcgaaagacatagagtaagttgatcatatgaatatcctccttag    |
| pcnBDO          | tgggatgttccatcagttccaggcgcggttgcctgacgtgtaggctggagctgcttcg    |
| pcnB-E1         | cgctgagctatgattagccg                                          |
| pcnB-E2         | tccggtctaatgacgcaagc                                          |
| hilD200UP       | aaggctgattatataacacgattttgtgaactgtcatcattccggggatccgctcgacc   |
| hilD150UP       | ttgttctgtccggaagacagcttatactgatatctatggattccggggatccgctcgacc  |
| hilD100UP       | cagactgcgcattaacacgctctatcaggatgggaggctaattccggggatccgctcgacc |
| hilD50UP        | atctgtcacttaagtaaagattttattaaaattgaataattccggggatccgctcgacc   |
| hilD25UP        | atggcgaaccattaacattttgtatctgtcacttaagtattccggggatccgctcgacc   |
| hilD50endDO     | gttttaccagtcacatagcgatgacaagttcacaanaatgtgtaggctggagctgcttc   |
| EPF043          | gcggctagcaaaggagaagaactttcactgg                               |

---

|        |                                        |
|--------|----------------------------------------|
| EPF044 | cagatacaaaaaatgttattttagagctcatcc      |
| EPF045 | gagctctacaaataacatttttgtatctgtcacttaag |
| EPF046 | gcggctagctgcctggcagaaagctaacaagc       |
| EPF047 | gaccatccccggaatttattttagagctcatcc      |
| EPF048 | gagctctacaaataaattccgggatccgtcgacc     |
| EPF098 | cttacgatgtgaatatagcctcccatcctgatagagcg |
| EPF103 | cttacgatgtgaatattaatggctgccattttatg    |
| EPF104 | atggcgaaccattaatattcacatcgtaagaattcg   |

---
